# Supplementary material
Source: PubMed Central journal article supplement (PMC2878091)
Supplement: supp_M110.114819_jbc.M110.114819-1.pdf [file supp_M110.114819_jbc.M110.114819-1.pdf]

## Supplemental Material

| <b>Table 1S. Binding to bilayers versus monolayers</b> |                                                             |
|--------------------------------------------------------|-------------------------------------------------------------|
| <b>Peptides</b>                                        | <b><math>K_{\text{bilayer}}/K_{\text{monolayer}}</math></b> |
| gH626-644                                              | 0.9                                                         |
| gH625-644                                              | 0.7                                                         |
| Melittin                                               | 36                                                          |
| gp41-FP                                                | 0.8                                                         |

**Table 2S. Relevant NOESY (150 ms)-derived distances (Å), as obtained by CALIBA module of CYANA, for gH617-644 in TFE/H<sub>2</sub>O (80/20 v/v).**

| <b>Intraresidue</b> |     |                  |     |      |
|---------------------|-----|------------------|-----|------|
| E <sup>618</sup>    | HA  | E <sup>618</sup> | HB2 | 3.30 |
| E <sup>618</sup>    | HA  | E <sup>618</sup> | HB3 | 3.36 |
| E <sup>618</sup>    | HN  | E <sup>618</sup> | HA  | 3.64 |
| E <sup>618</sup>    | HN  | E <sup>618</sup> | HB2 | 3.73 |
| E <sup>618</sup>    | HN  | E <sup>618</sup> | HB3 | 3.17 |
| V <sup>619</sup>    | HA  | V <sup>619</sup> | HB  | 3.30 |
| V <sup>619</sup>    | HN  | V <sup>619</sup> | HA  | 3.08 |
| V <sup>619</sup>    | HN  | V <sup>619</sup> | HB  | 3.11 |
| L <sup>620</sup>    | HA  | L <sup>620</sup> | OB  | 3.99 |
| L <sup>620</sup>    | HN  | L <sup>620</sup> | HA  | 3.08 |
| L <sup>620</sup>    | HN  | L <sup>620</sup> | OB  | 3.93 |
| A <sup>621</sup>    | HN  | A <sup>621</sup> | HA  | 3.05 |
| O <sup>622</sup>    | HN  | O <sup>622</sup> | HA  | 2.93 |
| O <sup>622</sup>    | HN  | O <sup>622</sup> | OB  | 3.96 |
| O <sup>623</sup>    | HN  | O <sup>623</sup> | HA  | 3.14 |
| O <sup>623</sup>    | HN  | O <sup>623</sup> | OB  | 4.58 |
| T <sup>624</sup>    | HA  | T <sup>624</sup> | HB  | 3.61 |
| T <sup>624</sup>    | HN  | T <sup>624</sup> | HA  | 2.74 |
| T <sup>624</sup>    | HN  | T <sup>624</sup> | HB  | 2.83 |
| H <sup>625</sup>    | HA  | H <sup>625</sup> | HD2 | 5.50 |
| H <sup>625</sup>    | HA  | H <sup>625</sup> | OB  | 3.71 |
| H <sup>625</sup>    | HN  | H <sup>625</sup> | HA  | 3.02 |
| H <sup>625</sup>    | HN  | H <sup>625</sup> | OB  | 3.83 |
| G <sup>626</sup>    | HN  | G <sup>626</sup> | HA1 | 2.60 |
| G <sup>626</sup>    | HN  | G <sup>626</sup> | HA2 | 2.80 |
| L <sup>627</sup>    | HA  | L <sup>627</sup> | OB  | 4.14 |
| L <sup>627</sup>    | HN  | L <sup>627</sup> | HA  | 3.14 |
| L <sup>627</sup>    | HN  | L <sup>627</sup> | HG  | 5.50 |
| L <sup>627</sup>    | HN  | L <sup>627</sup> | OB  | 4.42 |
| A <sup>628</sup>    | HA  | A <sup>628</sup> | OB  | 5.72 |
| A <sup>628</sup>    | HN  | A <sup>628</sup> | HA  | 2.96 |
| S <sup>629</sup>    | HA  | S <sup>629</sup> | HB2 | 2.74 |
| S <sup>629</sup>    | HA  | S <sup>629</sup> | HB3 | 3.08 |
| S <sup>629</sup>    | HN  | S <sup>629</sup> | HA  | 3.02 |
| S <sup>629</sup>    | HN  | S <sup>629</sup> | HB2 | 2.65 |
| S <sup>629</sup>    | HN  | S <sup>629</sup> | HB3 | 2.98 |
| T <sup>630</sup>    | HA  | T <sup>630</sup> | HB  | 3.02 |
| T <sup>630</sup>    | HN  | T <sup>630</sup> | HA  | 3.05 |
| T <sup>630</sup>    | HN  | T <sup>630</sup> | HB  | 2.96 |
| L <sup>631</sup>    | HA  | L <sup>631</sup> | HG  | 5.50 |
| L <sup>631</sup>    | HA  | L <sup>631</sup> | OB  | 4.30 |
| L <sup>631</sup>    | HN  | L <sup>631</sup> | HA  | 3.02 |
| L <sup>631</sup>    | HN  | L <sup>631</sup> | HG  | 5.50 |
| L <sup>631</sup>    | HN  | L <sup>631</sup> | OB  | 4.39 |
| T <sup>632</sup>    | HA  | T <sup>632</sup> | HB  | 3.45 |
| T <sup>632</sup>    | HN  | T <sup>632</sup> | HA  | 2.77 |
| T <sup>632</sup>    | HN  | T <sup>632</sup> | HB  | 3.02 |
| R <sup>633</sup>    | HA  | R <sup>633</sup> | HB2 | 3.17 |
| R <sup>633</sup>    | HA  | R <sup>633</sup> | HB3 | 3.17 |
| R <sup>633</sup>    | HB3 | R <sup>633</sup> | HE  | 5.50 |
| R <sup>633</sup>    | HG2 | R <sup>633</sup> | HE  | 5.50 |
| R <sup>633</sup>    | HG3 | R <sup>633</sup> | HE  | 5.50 |
| R <sup>633</sup>    | HN  | R <sup>633</sup> | HA  | 3.27 |
| R <sup>633</sup>    | HN  | R <sup>633</sup> | HB2 | 3.08 |
| R <sup>633</sup>    | HN  | R <sup>633</sup> | HB3 | 3.14 |
| R <sup>633</sup>    | HN  | R <sup>633</sup> | HG2 | 5.50 |
| W <sup>634</sup>    | HA  | W <sup>634</sup> | HB2 | 2.86 |
| W <sup>634</sup>    | HA  | W <sup>634</sup> | HB3 | 2.74 |
| W <sup>634</sup>    | HA  | W <sup>634</sup> | HD1 | 5.50 |
| W <sup>634</sup>    | HA  | W <sup>634</sup> | HE3 | 5.50 |
| W <sup>634</sup>    | HB2 | W <sup>634</sup> | HD1 | 5.50 |
| W <sup>634</sup>    | HB2 | W <sup>634</sup> | HE3 | 5.50 |
| W <sup>634</sup>    | HB3 | W <sup>634</sup> | HD1 | 5.50 |
| W <sup>634</sup>    | HB3 | W <sup>634</sup> | HE3 | 5.50 |
| W <sup>634</sup>    | HN  | W <sup>634</sup> | HA  | 2.99 |
| W <sup>634</sup>    | HN  | W <sup>634</sup> | HB2 | 2.99 |
| W <sup>634</sup>    | HN  | W <sup>634</sup> | HB3 | 2.86 |
| W <sup>634</sup>    | HB3 | W <sup>634</sup> | HB2 | 3.98 |
| A <sup>635</sup>    | HN  | A <sup>635</sup> | HA  | 3.11 |
| H <sup>636</sup>    | HA  | H <sup>636</sup> | HD2 | 5.50 |
| H <sup>636</sup>    | HA  | H <sup>636</sup> | OB  | 3.87 |
| H <sup>636</sup>    | HN  | H <sup>636</sup> | HA  | 2.99 |
| H <sup>636</sup>    | HN  | H <sup>636</sup> | OB  | 3.87 |
| Y <sup>637</sup>    | HA  | Y <sup>637</sup> | HB2 | 2.71 |

|                  |      |                  |      |      |
|------------------|------|------------------|------|------|
| Y <sup>637</sup> | HA   | Y <sup>637</sup> | HB3  | 2.74 |
| Y <sup>637</sup> | HN   | Y <sup>637</sup> | HA   | 2.80 |
| Y <sup>637</sup> | HN   | Y <sup>637</sup> | HB2  | 3.05 |
| Y <sup>637</sup> | HN   | Y <sup>637</sup> | HB3  | 3.11 |
| N <sup>638</sup> | HA   | N <sup>638</sup> | HB2  | 2.86 |
| N <sup>638</sup> | HA   | N <sup>638</sup> | HB3  | 2.99 |
| N <sup>638</sup> | HA   | N <sup>638</sup> | HD22 | 5.50 |
| N <sup>638</sup> | HB2  | N <sup>638</sup> | HD21 | 5.50 |
| N <sup>638</sup> | HB2  | N <sup>638</sup> | HD22 | 5.50 |
| N <sup>638</sup> | HB3  | N <sup>638</sup> | HD22 | 5.50 |
| N <sup>638</sup> | HD21 | N <sup>638</sup> | HD22 | 4.23 |
| N <sup>638</sup> | HN   | N <sup>638</sup> | HA   | 3.05 |
| N <sup>638</sup> | HN   | N <sup>638</sup> | HB2  | 2.80 |
| N <sup>638</sup> | HN   | N <sup>638</sup> | HB3  | 3.08 |
| A <sup>639</sup> | HN   | A <sup>639</sup> | HA   | 2.77 |
| L <sup>640</sup> | HA   | L <sup>640</sup> | HG   | 5.07 |
| L <sup>640</sup> | HA   | L <sup>640</sup> | OB   | 3.87 |
| L <sup>640</sup> | HN   | L <sup>640</sup> | HA   | 2.80 |
| L <sup>640</sup> | HN   | L <sup>640</sup> | HG   | 5.50 |
| L <sup>640</sup> | HN   | L <sup>640</sup> | OB   | 3.99 |
| I <sup>641</sup> | HN   | I <sup>641</sup> | HA   | 3.05 |
| I <sup>641</sup> | HN   | I <sup>641</sup> | HB   | 2.86 |
| R <sup>642</sup> | HG2  | R <sup>642</sup> | HE   | 5.50 |
| R <sup>642</sup> | HG3  | R <sup>642</sup> | HE   | 5.50 |
| R <sup>642</sup> | HN   | R <sup>642</sup> | HA   | 3.24 |
| R <sup>642</sup> | HN   | R <sup>642</sup> | HG2  | 5.50 |
| R <sup>642</sup> | HN   | R <sup>642</sup> | HG3  | 5.50 |
| R <sup>642</sup> | HN   | R <sup>642</sup> | OB   | 4.83 |
| A <sup>643</sup> | HN   | A <sup>643</sup> | HA   | 2.86 |

### Inter-residue

|                  |     |                  |     |      |
|------------------|-----|------------------|-----|------|
| V <sup>617</sup> | HA  | E <sup>618</sup> | HN  | 3.42 |
| E <sup>618</sup> | HA  | V <sup>619</sup> | HN  | 2.77 |
| E <sup>618</sup> | HA  | A <sup>621</sup> | OB  | 6.53 |
| V <sup>619</sup> | HA  | I <sup>620</sup> | HN  | 3.14 |
| V <sup>619</sup> | HB  | L <sup>620</sup> | HN  | 3.55 |
| L <sup>620</sup> | HA  | A <sup>621</sup> | HN  | 3.30 |
| L <sup>620</sup> | HA  | O <sup>623</sup> | HN  | 4.17 |
| L <sup>620</sup> | OB  | A <sup>621</sup> | HN  | 4.27 |
| A <sup>621</sup> | HN  | O <sup>622</sup> | HN  | 3.76 |
| O <sup>622</sup> | HA  | H <sup>625</sup> | OB  | 3.96 |
| O <sup>622</sup> | HA  | O <sup>623</sup> | HN  | 3.70 |
| O <sup>622</sup> | HN  | O <sup>623</sup> | HN  | 3.36 |
| O <sup>622</sup> | OB  | T <sup>624</sup> | HN  | 5.04 |
| O <sup>623</sup> | HN  | T <sup>624</sup> | HN  | 3.61 |
| O <sup>623</sup> | OB  | T <sup>624</sup> | HN  | 5.07 |
| T <sup>624</sup> | HA  | L <sup>627</sup> | OB  | 4.27 |
| H <sup>625</sup> | HA  | G <sup>626</sup> | HN  | 3.55 |
| H <sup>625</sup> | HA  | A <sup>628</sup> | HN  | 3.50 |
| H <sup>625</sup> | HN  | G <sup>626</sup> | HN  | 2.90 |
| H <sup>625</sup> | OB  | G <sup>626</sup> | HN  | 4.70 |
| G <sup>626</sup> | HA1 | L <sup>627</sup> | HN  | 3.47 |
| G <sup>626</sup> | HA1 | S <sup>629</sup> | HN  | 3.71 |
| G <sup>626</sup> | HN  | I <sup>627</sup> | HN  | 3.04 |
| L <sup>627</sup> | HA  | A <sup>628</sup> | HN  | 3.70 |
| L <sup>627</sup> | HA  | T <sup>630</sup> | HB  | 4.01 |
| L <sup>627</sup> | HA  | T <sup>630</sup> | HN  | 3.57 |
| L <sup>627</sup> | HA  | I <sup>631</sup> | HN  | 4.91 |
| L <sup>627</sup> | HG  | A <sup>628</sup> | HN  | 5.50 |
| L <sup>627</sup> | HN  | A <sup>628</sup> | HN  | 3.01 |
| L <sup>627</sup> | OB  | A <sup>628</sup> | HN  | 4.70 |
| A <sup>628</sup> | HA  | S <sup>629</sup> | HN  | 3.90 |
| A <sup>628</sup> | HA  | I <sup>631</sup> | HN  | 3.73 |
| A <sup>628</sup> | HA  | L <sup>631</sup> | OB  | 4.18 |
| A <sup>628</sup> | HN  | S <sup>629</sup> | HN  | 3.07 |
| S <sup>629</sup> | HA  | T <sup>630</sup> | HN  | 3.58 |
| S <sup>629</sup> | HA  | R <sup>633</sup> | HN  | 4.17 |
| S <sup>629</sup> | HN  | T <sup>630</sup> | HN  | 3.03 |
| T <sup>630</sup> | HA  | L <sup>631</sup> | HN  | 4.50 |
| T <sup>630</sup> | HA  | R <sup>633</sup> | HB2 | 3.36 |
| T <sup>630</sup> | HA  | R <sup>633</sup> | HB3 | 3.39 |
| T <sup>630</sup> | HA  | R <sup>633</sup> | HN  | 3.42 |
| T <sup>630</sup> | HB  | I <sup>631</sup> | HN  | 3.21 |
| T <sup>630</sup> | HN  | L <sup>631</sup> | HN  | 3.46 |
| L <sup>631</sup> | HA  | W <sup>634</sup> | HB2 | 2.80 |
| L <sup>631</sup> | HA  | W <sup>634</sup> | HB3 | 2.90 |
| L <sup>631</sup> | HA  | A <sup>635</sup> | HN  | 4.69 |
| L <sup>631</sup> | HG  | T <sup>632</sup> | HN  | 5.50 |
| L <sup>631</sup> | HN  | T <sup>632</sup> | HN  | 2.90 |
| L <sup>631</sup> | OB  | T <sup>632</sup> | HN  | 4.61 |
| T <sup>632</sup> | HA  | A <sup>635</sup> | HN  | 4.01 |
| T <sup>632</sup> | HB  | R <sup>633</sup> | HN  | 3.24 |
| T <sup>632</sup> | HN  | R <sup>633</sup> | HN  | 3.64 |

|                  |      |                  |     |      |
|------------------|------|------------------|-----|------|
| R <sup>633</sup> | HA   | W <sup>634</sup> | HN  | 3.42 |
| R <sup>633</sup> | HA   | H <sup>636</sup> | OB  | 4.24 |
| R <sup>633</sup> | HB2  | W <sup>634</sup> | HN  | 3.64 |
| R <sup>633</sup> | HB3  | W <sup>634</sup> | HN  | 3.55 |
| R <sup>633</sup> | HN   | W <sup>634</sup> | HN  | 4.23 |
| W <sup>634</sup> | HA   | A <sup>635</sup> | HN  | 4.79 |
| W <sup>634</sup> | HA   | Y <sup>637</sup> | HB2 | 3.14 |
| W <sup>634</sup> | HA   | Y <sup>637</sup> | HB3 | 3.08 |
| W <sup>634</sup> | HB2  | A <sup>635</sup> | HN  | 3.55 |
| W <sup>634</sup> | HB3  | A <sup>635</sup> | HN  | 4.14 |
| W <sup>634</sup> | HD1  | A <sup>635</sup> | HA  | 5.50 |
| W <sup>634</sup> | HN   | A <sup>635</sup> | HN  | 3.70 |
| A <sup>635</sup> | HA   | H <sup>636</sup> | HN  | 3.70 |
| A <sup>635</sup> | HA   | N <sup>638</sup> | HB2 | 3.42 |
| A <sup>635</sup> | HA   | N <sup>638</sup> | HB3 | 3.45 |
| A <sup>635</sup> | HA   | N <sup>638</sup> | HN  | 3.36 |
| A <sup>635</sup> | HN   | H <sup>636</sup> | HN  | 3.09 |
| H <sup>636</sup> | HN   | Y <sup>637</sup> | HN  | 3.30 |
| H <sup>636</sup> | OB   | Y <sup>637</sup> | HN  | 4.58 |
| Y <sup>637</sup> | HA   | N <sup>638</sup> | HN  | 3.48 |
| Y <sup>637</sup> | HA   | I <sup>640</sup> | HN  | 3.39 |
| Y <sup>637</sup> | HB2  | N <sup>638</sup> | HN  | 3.55 |
| Y <sup>637</sup> | HB3  | N <sup>638</sup> | HN  | 3.33 |
| Y <sup>637</sup> | HN   | N <sup>638</sup> | HN  | 4.23 |
| N <sup>638</sup> | HA   | J <sup>641</sup> | HN  | 3.42 |
| N <sup>638</sup> | HA   | R <sup>642</sup> | HN  | 4.43 |
| N <sup>638</sup> | HB2  | A <sup>639</sup> | HN  | 3.58 |
| N <sup>638</sup> | HB3  | A <sup>639</sup> | HN  | 3.92 |
| N <sup>638</sup> | HN   | A <sup>639</sup> | HN  | 2.92 |
| A <sup>639</sup> | HN   | I <sup>640</sup> | HN  | 2.91 |
| L <sup>640</sup> | HG   | I <sup>641</sup> | HN  | 5.50 |
| I <sup>641</sup> | HA   | R <sup>642</sup> | HN  | 2.86 |
| I <sup>641</sup> | HG13 | R <sup>642</sup> | HN  | 5.50 |
| I <sup>641</sup> | HN   | R <sup>642</sup> | HN  | 3.47 |
| R <sup>642</sup> | HN   | A <sup>643</sup> | HN  | 3.95 |

**Table 3S. Relevant NOESY (150 ms)-  
derived distances (Å), as obtained by  
CALIBA module of CYANA, for gH626-639  
in TFE/H<sub>2</sub>O (80/20 v/v).**

| <b>Intraresidue</b> |     |                  |     |      |
|---------------------|-----|------------------|-----|------|
| L <sup>627</sup>    | HN  | L <sup>627</sup> | HA  | 2.40 |
| L <sup>627</sup>    | HN  | L <sup>627</sup> | QB  | 4.33 |
| L <sup>627</sup>    | HA  | L <sup>627</sup> | QB  | 3.96 |
| A <sup>628</sup>    | HN  | A <sup>628</sup> | HA  | 3.30 |
| S <sup>629</sup>    | HA  | S <sup>629</sup> | HB2 | 3.08 |
| S <sup>629</sup>    | HN  | S <sup>629</sup> | HA  | 3.21 |
| S <sup>629</sup>    | HN  | S <sup>629</sup> | HB2 | 3.42 |
| S <sup>629</sup>    | HN  | S <sup>629</sup> | HB3 | 3.55 |
| S <sup>629</sup>    | HA  | S <sup>629</sup> | HB3 | 3.73 |
| T <sup>630</sup>    | HN  | T <sup>630</sup> | HA  | 3.11 |
| T <sup>630</sup>    | HN  | T <sup>630</sup> | HB  | 2.96 |
| T <sup>630</sup>    | HN  | T <sup>630</sup> | QG2 | 4.76 |
| T <sup>630</sup>    | HA  | T <sup>630</sup> | HB  | 3.52 |
| L <sup>631</sup>    | HN  | L <sup>631</sup> | HA  | 3.08 |
| L <sup>631</sup>    | HN  | L <sup>631</sup> | HG  | 5.50 |
| L <sup>631</sup>    | HN  | L <sup>631</sup> | QB  | 4.02 |
| L <sup>631</sup>    | HA  | L <sup>631</sup> | QB  | 4.58 |
| T <sup>632</sup>    | HA  | T <sup>632</sup> | HB  | 3.33 |
| T <sup>632</sup>    | HN  | T <sup>632</sup> | HA  | 3.21 |
| T <sup>632</sup>    | HN  | T <sup>632</sup> | HB  | 3.05 |
| R <sup>633</sup>    | HA  | R <sup>633</sup> | HG2 | 5.50 |
| R <sup>633</sup>    | HA  | R <sup>633</sup> | HG3 | 5.50 |
| R <sup>633</sup>    | HA  | R <sup>633</sup> | QG  | 3.80 |
| R <sup>633</sup>    | HN  | R <sup>633</sup> | HA  | 2.90 |
| R <sup>633</sup>    | HN  | R <sup>633</sup> | HG2 | 5.50 |
| R <sup>633</sup>    | HN  | R <sup>633</sup> | QB  | 3.99 |
| W <sup>634</sup>    | HA  | W <sup>634</sup> | HB2 | 3.02 |
| W <sup>634</sup>    | HA  | W <sup>634</sup> | HB3 | 2.40 |
| W <sup>634</sup>    | HA  | W <sup>634</sup> | HD1 | 5.50 |
| W <sup>634</sup>    | HA  | W <sup>634</sup> | HE3 | 5.50 |
| W <sup>634</sup>    | HB2 | W <sup>634</sup> | HD1 | 5.50 |
| W <sup>634</sup>    | HB3 | W <sup>634</sup> | HD1 | 5.50 |
| W <sup>634</sup>    | HB3 | W <sup>634</sup> | HE3 | 5.50 |
| W <sup>634</sup>    | HD1 | W <sup>634</sup> | HE1 | 5.50 |
| W <sup>634</sup>    | HH2 | W <sup>634</sup> | HZ2 | 5.50 |
| W <sup>634</sup>    | HZ3 | W <sup>634</sup> | HZ2 | 5.50 |
| W <sup>634</sup>    | HH2 | W <sup>634</sup> | HE3 | 5.50 |
| W <sup>634</sup>    | HZ3 | W <sup>634</sup> | HE3 | 5.50 |
| W <sup>634</sup>    | HZ2 | W <sup>634</sup> | HE1 | 5.50 |
| W <sup>634</sup>    | HB2 | W <sup>634</sup> | HE3 | 5.50 |
| W <sup>634</sup>    | HZ3 | W <sup>634</sup> | HH2 | 5.50 |
| W <sup>634</sup>    | HN  | W <sup>634</sup> | HA  | 3.24 |
| W <sup>634</sup>    | HN  | W <sup>634</sup> | HB2 | 3.14 |
| W <sup>634</sup>    | HN  | W <sup>634</sup> | HB3 | 3.02 |
| A <sup>635</sup>    | HN  | A <sup>635</sup> | HA  | 3.30 |
| H <sup>636</sup>    | HA  | H <sup>636</sup> | HB2 | 3.17 |
| H <sup>636</sup>    | HA  | H <sup>636</sup> | HD2 | 5.50 |
| H <sup>636</sup>    | HB2 | H <sup>636</sup> | HD2 | 5.50 |
| H <sup>636</sup>    | HB3 | H <sup>636</sup> | HD2 | 5.50 |
| H <sup>636</sup>    | HB3 | H <sup>636</sup> | HB2 | 5.44 |
| H <sup>636</sup>    | HN  | H <sup>636</sup> | HA  | 2.80 |
| H <sup>636</sup>    | HN  | H <sup>636</sup> | HB2 | 3.52 |

|                  |      |                  |      |      |
|------------------|------|------------------|------|------|
| H <sup>636</sup> | HN   | H <sup>636</sup> | HB3  | 3.05 |
| Y <sup>637</sup> | HA   | Y <sup>637</sup> | HB2  | 3.27 |
| Y <sup>637</sup> | HN   | Y <sup>637</sup> | HA   | 2.90 |
| Y <sup>637</sup> | HN   | Y <sup>637</sup> | HB2  | 3.27 |
| Y <sup>637</sup> | HN   | Y <sup>637</sup> | HB3  | 3.17 |
| N <sup>638</sup> | HN   | N <sup>638</sup> | HB2  | 4.07 |
| N <sup>638</sup> | HN   | N <sup>638</sup> | HB3  | 3.52 |
| N <sup>638</sup> | HA   | N <sup>638</sup> | HB3  | 3.58 |
| N <sup>638</sup> | HB3  | N <sup>638</sup> | HD21 | 5.50 |
| N <sup>638</sup> | HB2  | N <sup>638</sup> | HB3  | 3.24 |
| N <sup>638</sup> | HD22 | N <sup>638</sup> | HD21 | 5.50 |
| A <sup>639</sup> | HN   | A <sup>639</sup> | HA   | 3.64 |

Interesidue

|                  |     |                  |     |      |
|------------------|-----|------------------|-----|------|
| G626             | HA1 | L <sup>627</sup> | HN  | 2.40 |
| G626             | HA2 | L <sup>627</sup> | HN  | 3.27 |
| L <sup>627</sup> | QB  | A <sup>628</sup> | HN  | 4.52 |
| L <sup>627</sup> | HA  | A <sup>628</sup> | HN  | 3.73 |
| A <sup>628</sup> | HA  | S <sup>629</sup> | HN  | 3.92 |
| A <sup>628</sup> | HA  | L <sup>631</sup> | HN  | 4.32 |
| A <sup>628</sup> | HA  | L <sup>631</sup> | QB  | 5.29 |
| A <sup>628</sup> | HN  | S <sup>629</sup> | HN  | 3.75 |
| S <sup>629</sup> | HA  | T <sup>630</sup> | HN  | 3.48 |
| S <sup>629</sup> | HA  | T <sup>632</sup> | HN  | 3.66 |
| S <sup>629</sup> | HN  | T <sup>630</sup> | HN  | 3.33 |
| T <sup>630</sup> | HA  | L <sup>631</sup> | HN  | 3.95 |
| T <sup>630</sup> | HB  | L <sup>631</sup> | HN  | 3.14 |
| T <sup>630</sup> | HN  | L <sup>631</sup> | HN  | 3.45 |
| L <sup>631</sup> | HA  | W <sup>634</sup> | HB2 | 2.42 |
| L <sup>631</sup> | HA  | W <sup>634</sup> | HB3 | 2.45 |
| L <sup>631</sup> | HA  | W <sup>634</sup> | HN  | 3.50 |
| L <sup>631</sup> | HN  | T <sup>632</sup> | HN  | 2.80 |
| L <sup>631</sup> | QB  | T <sup>632</sup> | HN  | 5.17 |
| T <sup>632</sup> | HA  | A <sup>635</sup> | HN  | 4.11 |
| T <sup>632</sup> | HB  | R <sup>633</sup> | HN  | 3.33 |
| R <sup>633</sup> | HA  | A <sup>635</sup> | HN  | 3.98 |
| R <sup>633</sup> | HA  | H <sup>636</sup> | HB2 | 3.55 |
| R <sup>633</sup> | HA  | H <sup>636</sup> | HB3 | 4.07 |
| R <sup>633</sup> | HA  | W <sup>634</sup> | HN  | 3.83 |
| R <sup>633</sup> | HN  | W <sup>634</sup> | HN  | 3.27 |
| R <sup>633</sup> | QB  | W <sup>634</sup> | HN  | 4.52 |
| W <sup>634</sup> | HB2 | A <sup>635</sup> | HN  | 3.58 |
| W <sup>634</sup> | HB3 | A <sup>635</sup> | HN  | 4.01 |
| W <sup>634</sup> | HE3 | A <sup>635</sup> | HA  | 5.50 |
| W <sup>634</sup> | HN  | A <sup>635</sup> | HN  | 3.17 |
| W <sup>634</sup> | HA  | A <sup>635</sup> | HN  | 4.11 |
| A <sup>635</sup> | HA  | H <sup>636</sup> | HN  | 3.33 |
| A <sup>635</sup> | HN  | H <sup>636</sup> | HN  | 2.90 |
| H <sup>636</sup> | HB2 | Y <sup>637</sup> | HN  | 3.79 |
| H <sup>636</sup> | HB3 | Y <sup>637</sup> | HN  | 3.58 |
| Y <sup>637</sup> | HB3 | N <sup>638</sup> | HN  | 3.70 |
| N <sup>638</sup> | HA  | A <sup>639</sup> | HN  | 3.89 |

**Table 4S. Backbone dihedral angles (°) for gH617-644 and gH626-639 averaged over the 20 NMR minimized structures.**

| AA   | gH617-644 |          | gH626-639 |           |
|------|-----------|----------|-----------|-----------|
|      | $\phi$    | $\psi$   | $\phi$    | $\psi$    |
| V617 |           | 124+/-53 |           |           |
| E618 | -100+/-85 | 99+/-37  |           |           |
| V619 | -93+/-40  | 170+/-19 |           |           |
| L620 | 33+/-71   | 76+/-45  |           |           |
| A621 | -118+/-73 | -22+/-61 |           |           |
| Q622 | -96+/-78  | -28+/-57 |           |           |
| Q623 | -25+/-76  | 17+/-61  |           |           |
| T624 | 4+/-51    | 1+/-56   |           |           |
| H625 | -69+/-44  | -34+/-6  |           |           |
| G626 | -51+/-4   | -51+/-8  | -         | 170+/-31  |
| L627 | -60+/-12  | -42+/-6  | 61+/-10   | 70+/-31   |
| A628 | -58+/-3   | -53+/-4  | -158+/-87 | 41+/-56   |
| S629 | -54+/-2   | -45+/-1  | -88+/-34  | 0+/-26    |
| T630 | -53+/-2   | -61+/-1  | -79+/-34  | -53+/-5   |
| L631 | -52+/-2   | -48+/-2  | -66+/-7   | -30+/-9   |
| T632 | -55+/-1   | -48+/-2  | -59+/-10  | -54+/-11  |
| R633 | -63+/-2   | -30+/-2  | -70+/-9   | -29+/-9   |
| W634 | -80+/-3   | -43+/-6  | -42+/-8   | -48+/-3   |
| A635 | -54+/-6   | -48+/-2  | -129+/-15 | 53+/-14   |
| H636 | -58+/-3   | -42+/-3  | -54+/-7   | -106+/-63 |
| Y637 | -66+/-2   | -27+/-4  | -38+/-74  | 123+/-52  |
| N638 | -67+/-8   | -44+/-11 | -82+/-74  | 128+/-83  |
| A639 | -49+/-6   | -44+/-8  | -121+/-86 |           |
| L640 | -62+/-11  | -54+/-19 |           |           |
| I641 | -111+/-86 | 68+/-23  |           |           |
| R642 | -78+/-65  | 24+/-65  |           |           |
| A643 | -98+/-89  | 157+/-79 |           |           |
| F644 | -80+/-101 |          |           |           |
